# Supplementary material
Source: publisher site journal article supplement (https://e-cmh.org/upload/media/cmh-2024-0038-Supplementary-Fig-2.pdf)
Supplement: Supplementary file 1 [file cmh-2024-0038-Supplementary-Fig-2.pdf]

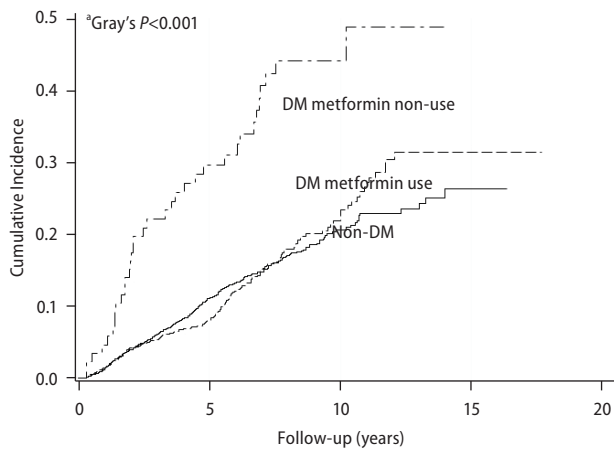

**A** The effects of DM with and without metformin for HCC risk

| Groups               | No. at risk | 5-year cumulative HCC (%) | <sup>b</sup> aSHR (95% CI) <i>P</i> -value |                  |
|----------------------|-------------|---------------------------|--------------------------------------------|------------------|
| DM metformin non-use | 86          | 29.7                      | 2.45 (1.95-4.24)                           | 2.28 (1.48-3.46) |
| DM metformin use     | 792         | 8.1                       | 1.12 (0.99-1.59)                           | 1                |
| Non-DM               | 1,901       | 11.1                      | 1                                          | 0.89 (0.63-1.01) |
|                      |             |                           |                                            | <i>P</i> =0.054  |

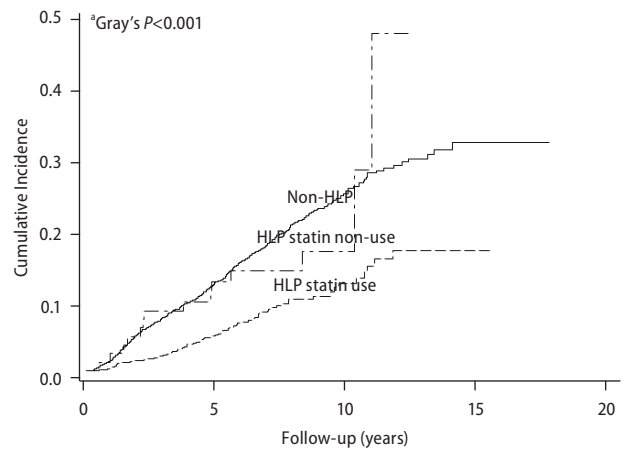

**B** The effects of HLP with and without statin for HCC risk.

| Groups             | No. at risk | 5-year cumulative HCC (%) | <sup>b</sup> aSHR (95% CI) <i>P</i> -value |                   |
|--------------------|-------------|---------------------------|--------------------------------------------|-------------------|
| HLP statin non-use | 82          | 12.7                      | 0.82 (0.49-1.38)                           | 1.84 (1.02-3.189) |
| HLP statin use     | 687         | 5.1                       | 0.43 (0.34-0.63)                           | 1                 |
| Non-HLP            | 2,010       | 12.7                      | 1                                          | 2.30 (1.60-2.90)  |
|                    |             |                           |                                            | <i>P</i> <0.001   |

**Supplementary Figure 2.** The effects of DM with and without metformin (A) and HLP with and without statin (B) on the new-onset HCC among CHC patients who failed antiviral therapy. Metformin or statin use was redefined as ever metformin or statin use before or after end-of-treatment. (A) <sup>a</sup>After considering death as a competing risk, a Kaplan–Meier plot was constructed using Gray’s cumulative incidence method. <sup>b</sup>All SHRs (95% CIs) and *p*-values were calculated using the Cox sub-distribution hazards method. \*Adjusted for age, sex, LC, HCV GT1, HCV RNA, aspirin, and HLP/statin. DM, diabetes mellitus; HLP, hyperlipidemia; HCC, hepatocellular carcinoma; SHR, sub-distribution hazard ratio; LC, liver cirrhosis; GT, genotype. (B) <sup>a</sup>After considering death as a competing risk, a Kaplan–Meier plot was constructed using Gray’s cumulative incidence method. <sup>b</sup>All SHRs (95% CIs) and *P*-values were calculated using the Cox sub-distribution hazards method. \*Adjusted for age, sex, LC, HCV GT1, HCV RNA, aspirin, and DM/metformin. DM, diabetes mellitus; HLP, hyperlipidemia; HCC, hepatocellular carcinoma; SHR, sub-distribution hazard ratio; LC, liver cirrhosis; GT, genotype.
